# Supplementary material for: Loss of RREB1 in pancreatic beta cells reduces cellular insulin content and affects endocrine cell gene expression
Source: PubMed Central journal article supplement (PMC9947029; doi:10.1007/s00125-022-05856-6), 2023-01-12
Supplement: 125_2022_5856_MOESM1_ESM.pdf [file 125_2022_5856_MOESM1_ESM.pdf]

## ESM Methods

### *Husbandry and transgenic lines*

Eggs from *Tg(ins:Hsa.HIST1H2BJ-mCherry)<sup>vu513</sup>* and *Tg(-2.8fabp10a:EGFP)<sup>as3TG</sup>* positive zebrafish were targeted at the *kita* gene at the single cell stage to reduce pigmentation and were fed from 5 dpf to 9 dpf as described in section “*CRISPR/Cas9 in zebrafish embryos*”. At 4 dpf, larvae were counted and distributed to six 1-litre tanks with 10 ml of filtered water per larva (40-60 larvae per tank). Three tanks were assigned to a 3% (w/v) glucose (Sigma-Aldrich) challenge and 3 tanks were controls (filtered water). Glucose treatment started at 5 dpf and larvae from all tanks were transferred into clean tanks with fresh water/glucose water daily, to reduce microbial growth in glucose water.

Imaging and image analysis of whole larvae and beta cell nuclei was carried out at 10 dpf as described in the “*Imaging of zebrafish larvae*” section with the following changes. Controls and glucose challenged larvae were imaged alternately. After imaging, larvae in 150 µl water were immediately collected into 1.5 ml vials containing 150 µl 2X DNA/RNA protection solution (Monarch Total RNA Miniprep Kit (New England Biolabs, USA)). Samples were stored at 4°C until the end of each imaging batch and then stored at -20°C until further processing.

RNA extraction of RNA > 200 nucleotides was carried out according to the standard protocol for RNA extraction from tissues or leukocytes using the Monarch Total RNA Miniprep Kit. After homogenizing larvae at max speed for 3 mins in 300 µl 1x DNA/RNA protection solution and three 1.4 mm acid washed zirconium beads (OPS diagnostics, USA) using a MiniG™ 1600 homogenizer (SPEX® SamplePrep, USA), the recommended on-bead DNase treatment was performed. RNA was eluted in 35 µl nuclease-free water. Residual genomic DNA was removed using the Turbo DNase Kit (ThermoFisher Scientific, USA) according to the manufacturer’s protocol; 19-90 ng of this RNA were used for reverse transcription using the High-Capacity cDNA

Reverse Transcription Kit with RNase Inhibitor (Applied Biosystems™, ThermoFisher Scientific, USA) according to the manufacturer's protocol. cDNA was diluted 20x in nuclease-free water.

A reference sample reverse transcribed from a mix of the five most concentrated RNA samples was used to generate a 2x dilution series. A RT-negative sample generated from a mix of equal volumes from five samples that together resulted in 90 ng was made to confirm the absence of detectable genomic DNA. Real time qPCR was carried out in triplicate per sample, standard series, reverse transcription-negative sample and no template control sample using the PowerUp™ SYBR™ Green Master Mix on a StepOne Plus real-time PCR machine (Applied Biosystems™, ThermoFisher Scientific, USA). Reaction volumes were 10 µl; with 3 µl 20x diluted sample and primer concentrations between 250-500 nmol/l. Primer sequences are shown in **ESM Table 4**. The following two-step cycling protocol was used: 1x 50°C 2 mins, 1x 95°C 2 mins, 40x (95°C 3 secs, 63°C 30 secs), melt curve 60-95°C. Expression data was determined using the standard curves; expression per sample was normalized by the average expression of *actb1* and *eef1a1*.

## ESM Tables

ESM Table 1: *RREB1* orthologues in *Danio rerio* (Ensembl release 105 - Dec 2021).

ESM Table 2: Gene IDs, CRISPOR scores and gRNA target sequences for zebrafish genes *rreb1a*, *rreb1b* and *kita*.

ESM Table 3: Sequences of primers used for fragment length analysis.

ESM Table 4: Sequences of primers used for qPCR based analysis of mutagenesis efficiency and gene expression in zebrafish larvae.

ESM Table 5: Ten most common coding mutations in *TP53* that were assessed in genome-edited hiPSC lines.

ESM Table 6: Composition of basal and complete differentiation media.

ESM Table 7: List of DEGs between si*RREB1* and siNT EndoC-βH1 cells.

ESM Table 8: List of DEGs between *RREB1*-KO and EV EndoC-βH1 cells.

ESM Table 9: Enriched biological terms and pathways among DEGs between *RREB1*-KO and EV EndoC-βH1 cells.

ESM Table 10: List of DEGs between *RREB1*<sup>KO/KO</sup> and *RREB1*<sup>WT/WT</sup> hiPSC during seven stages of *in vitro* beta cell differentiation.

ESM Table 11: Enriched biological terms and pathways among DEGs up-regulated in *RREB1*<sup>KO/KO</sup> lines at seven distinct stages of *in vitro* beta cell differentiation.

ESM Table 12: Module eigengenes identified in WGCNA for *RREB1*<sup>KO/KO</sup> and *RREB1*<sup>WT/WT</sup> lines during seven stages of *in vitro* beta cell differentiation.

## ESM Figures

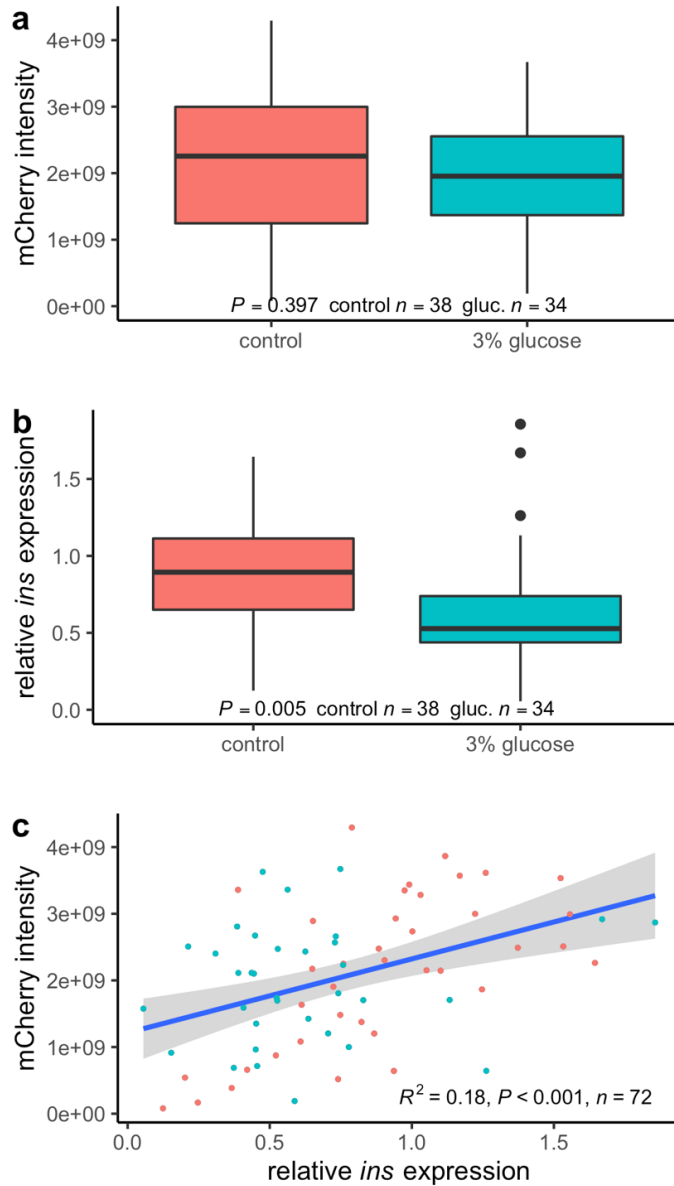

### ESM Fig. 1: Validation of the *ins:H2B-mCherry* reporter in 10 dpf zebrafish larvae.

Red = control (normal water), green = 3% glucose (normal water with 3% glucose from 5 to 10 dpf); (a) H2B-mCherry expressed under the control of the *insulin* promoter was quantified through image-based analysis where mCherry intensity is the total fluorescence intensity across segmented insulin-expressing nuclei; (b) *ins* expression measured by qPCR in homogenates of single larvae, normalized to the average expression of *actb1* and *eef1a1*; (c) mCherry total fluorescence intensity across segmented insulin expressing nuclei as a function of the relative *ins* expression of the same sample quantified using qPCR; Statistics: (a and b) students t-test; (c) Pearson correlation. Data were analyzed using R [1] and the packages (tidyverse, ggpubr, ggtext and ggplot2).

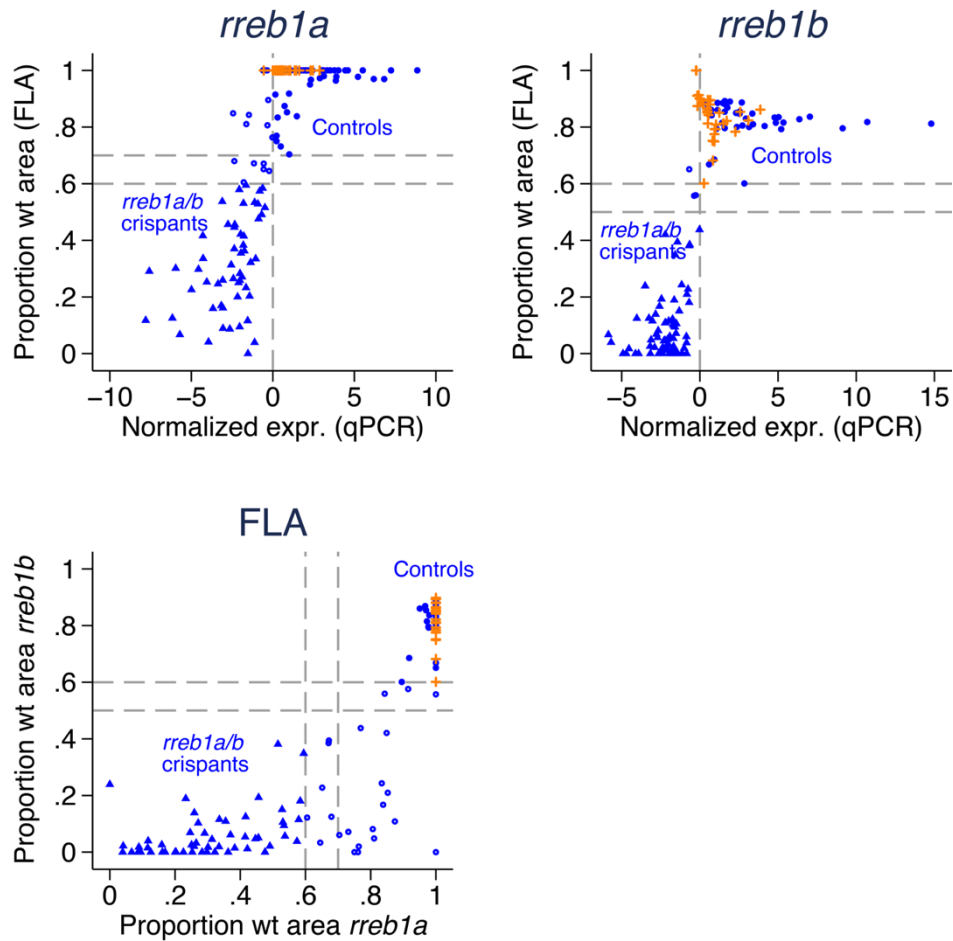

**ESM Fig. 2: Results from fragment length analysis and qPCR for 126 microinjected zebrafish larvae (10 dpf) and 32 un-injected controls.**

Comparing results from fragment length analysis and qPCR performed on the same samples shows that un-injected controls (orange crosses) have 100% of *rreb1a* (top left) and >60% of *rreb1b* (top right) peak area at the expected wildtype length. For both zebrafish genes, normalised gene expression based on qPCR results (i.e. residuals of expression at the CRISPR-targeted site adjusted for expression at a later exon) is >0 for most samples. Based on these results, we used fragment length analysis results for both genes (bottom left) to allocate larvae to the control group (blue triangles) if >70% of the *rreb1a* peak area and >60% of the *rreb1b* peak area was wildtype; while larvae with  $\leq 60\%$  and  $\leq 50\%$  of peak areas being wildtype for *rreb1a* and *rreb1b* were assigned to the *rreb1a/b* crispant group (filled blue circles). Larvae not fulfilling either criterion were excluded from the analysis (open blue circles).

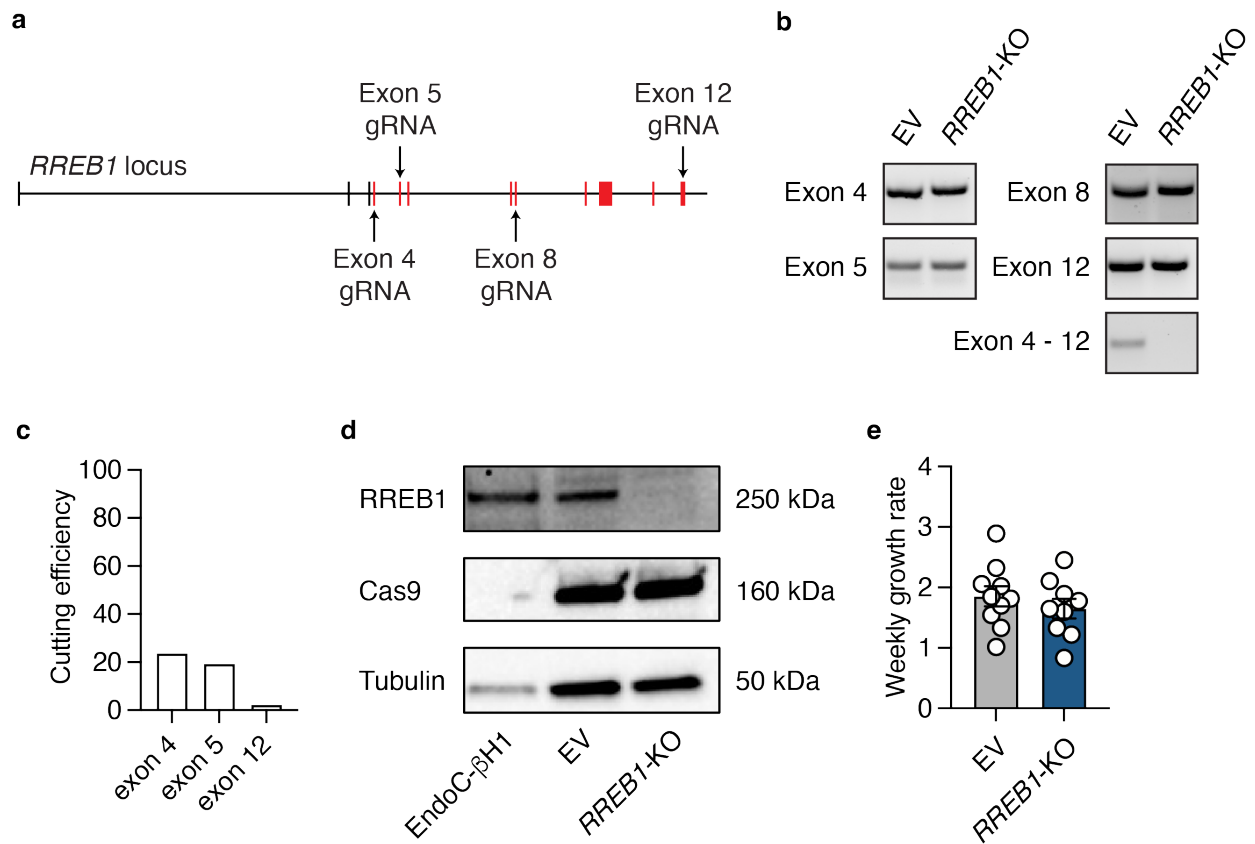

**ESM Fig. 3: Generation and characterisation of *RREB1*-KO EndoC-βH1 cells.**

(a) Schematic highlighting the genomic locations of the four sgRNAs used to generate *RREB1*-KO EndoC-βH1 cells. (b) Genomic PCR amplification of exon 4, 5, 8, 12, and exon 4 through 12 deletion in EV and *RREB1*-KO EndoC-βH1 cells. (c) Editing efficiency of individual sgRNAs in pooled *RREB1*-KO EndoC-βH1 cells. (d) Western blot for RREB1 (250 kDa), Cas9 (160 kDa), and Tubulin (50 kDa) in parental EndoC-βH1, EV control cells, and *RREB1*-KO knockout cells. (e) Weekly growth rate of EndoC-βH1 EV and *RREB1*-KO cells.

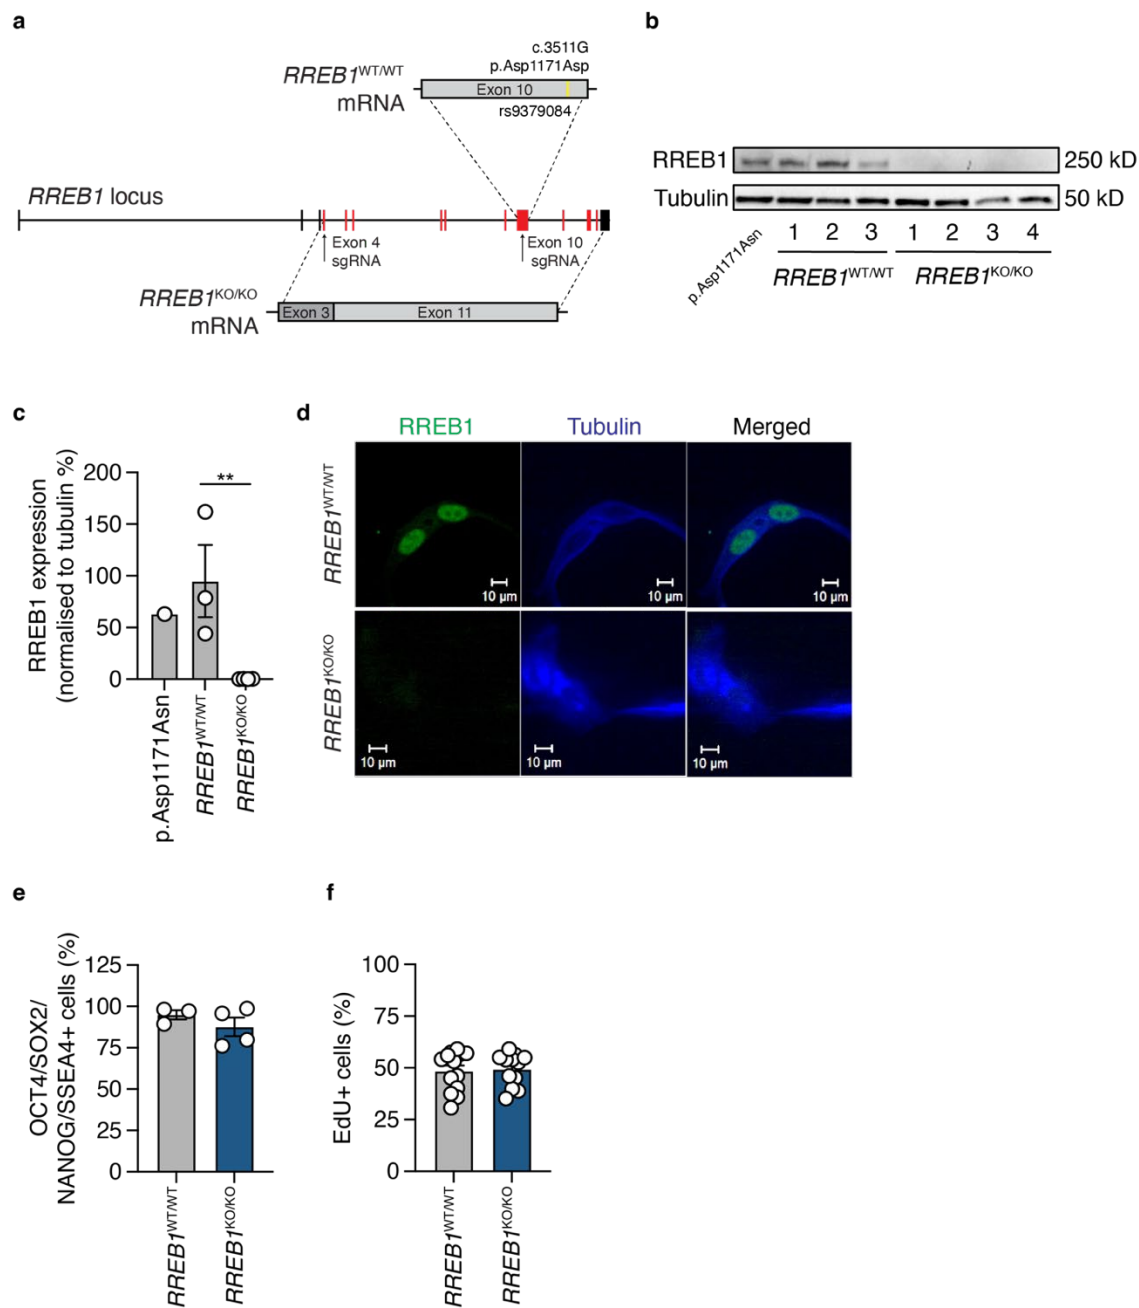

**ESM Fig. 4: Generation and characterisation of  $RREB1^{KO/KO}$  hiPSC lines.**

(a) Schematic highlighting the genomic locations of the two sgRNAs used to generate  $RREB1^{KO/KO}$  hiPSC lines by deleting ~50 kb of the  $RREB1$  gene. Located in exon 10 is rs9379084 (yellow) that was genetically engineered to be homozygous for the major p.Asp1171 allele. (b-c) Western blot and quantification for RREB1 (250 kDa) and Tubulin (50 kDa) in p.Asp1171Asn,  $RREB1^{WT/WT}$  and  $RREB1^{KO/KO}$  hiPSC lines. (d) Immunofluorescence staining of RREB1 (green) and tubulin (blue) in  $RREB1^{WT/WT}$  and  $RREB1^{KO/KO}$  hiPSC lines. (e) Quantification of percent of hiPSC cells expressing pluripotency proteins OCT4, SOX2, NANOG and SSEA4. (f) Quantification of the number of EdU+ hiPSCs. (Unpaired t-test)

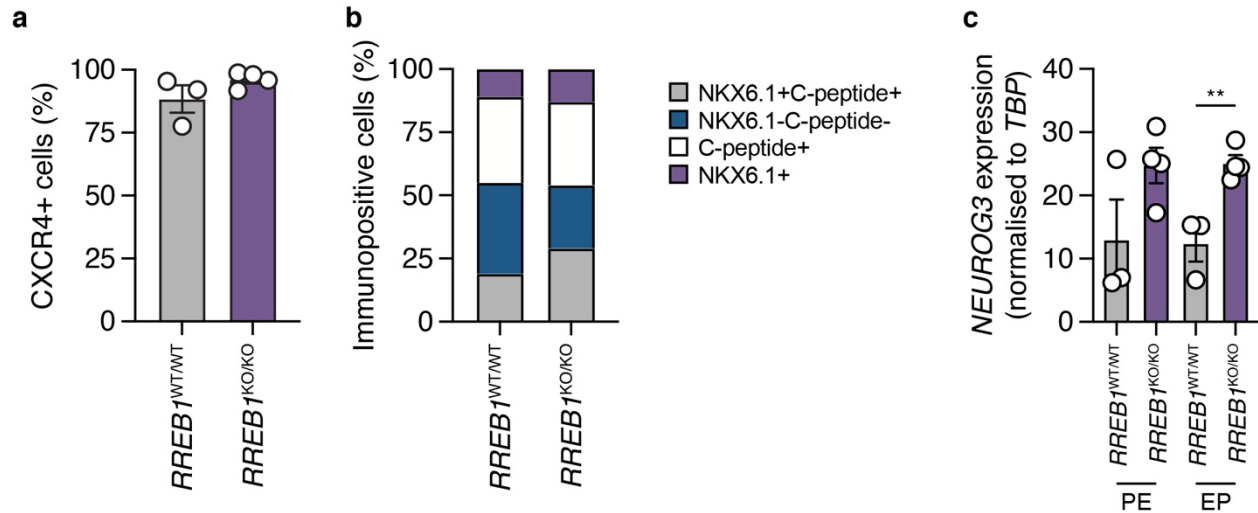

**ESM Fig. 5: Characterisation of *in vitro* differentiation of *RREB1*<sup>KO/KO</sup> and *RREB1*<sup>WT/WT</sup> clones towards beta-like cells.**

(a) Flow cytometric quantification of CXCR4+ definitive endoderm cells derived from *RREB1*<sup>KO/KO</sup> and *RREB1*<sup>WT/WT</sup> hiPSC lines. (b) Proportion BLCs of derived from *RREB1*<sup>WT/WT</sup> and *RREB1*<sup>KO/KO</sup> hiPSC cells immunopositive for NKX6.1+C-peptide+, NKX6.1-C-peptide-, C-peptide+, or NKX6.1+. (c) Expression of *NEUROG3* transcript in *RREB1*<sup>KO/KO</sup> and *RREB1*<sup>WT/WT</sup> hiPSC-derived pancreatic endoderm (PE) and endocrine progenitor (EP) cells. n=3-4. Data are presented as mean±SEM. p\*\*<0.01. (Unpaired t-test)



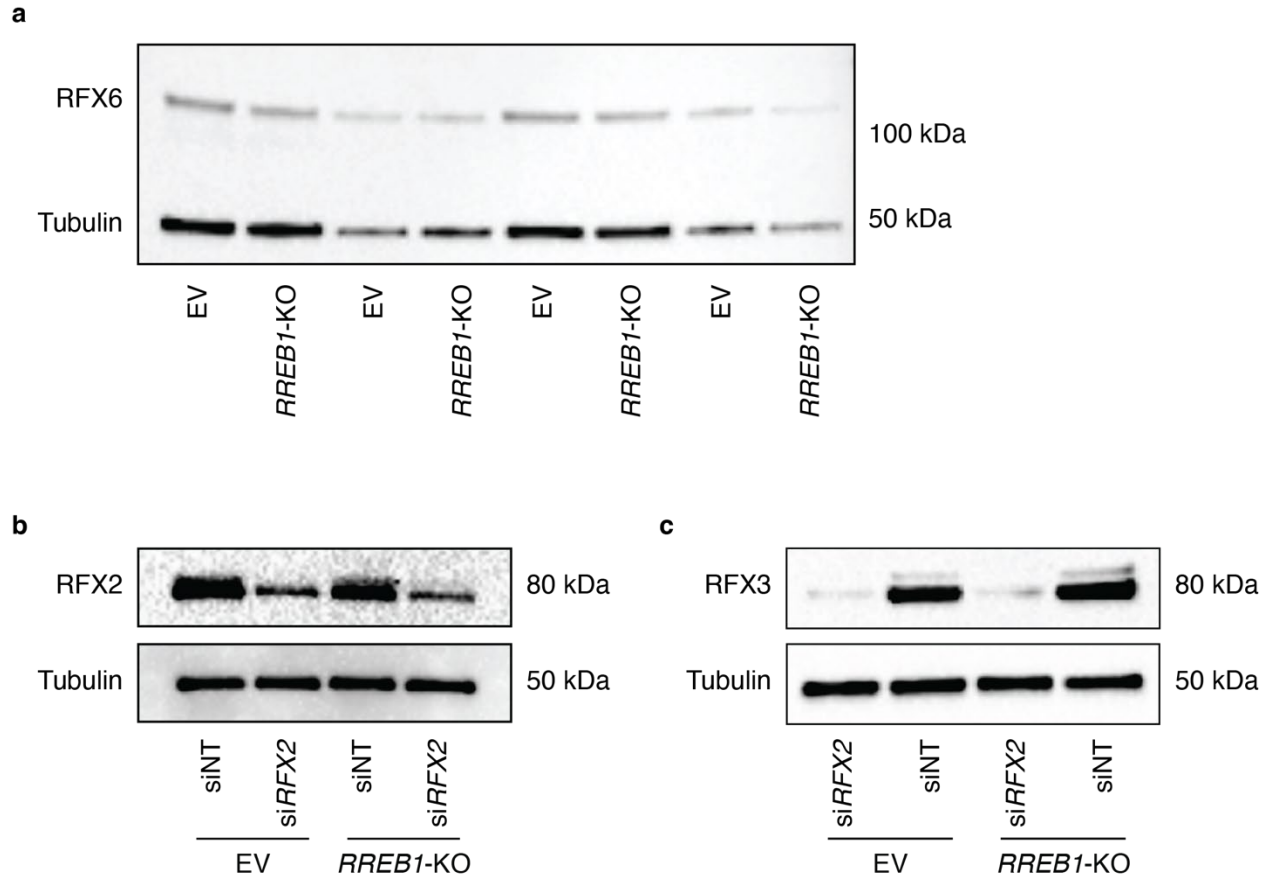

**ESM Fig. 6: Expression of RFX proteins in knockdown and knockout RREB1 EndoC- $\beta$ H1 cells.**

(a) Protein expression of RFX6 in EV and RREB1-KO EndoC- $\beta$ H1 cells. (b-c) Protein expression of (b) RFX2 and (c) RFX3 in siNT, siRFX2, and siRFX3 treated EV and RREB1-KO EndoC- $\beta$ H1 cells.

## Human Islets checklist

| Islet preparation                                                   | 1                 | 2                 | 3                 | 4                 | 5                 | 6                 | 7                 | 8 <sup>a</sup>    |
|---------------------------------------------------------------------|-------------------|-------------------|-------------------|-------------------|-------------------|-------------------|-------------------|-------------------|
| <b>MANDATORY INFORMATION</b>                                        |                   |                   |                   |                   |                   |                   |                   |                   |
| Unique identifier                                                   | R029              | R030              | R032              | R033              | R034              | R036              | R037              | R038              |
| Donor age (years)                                                   | 33                | 80                | 36                | 10                | 76                | 42                | 48                | 51                |
| Donor sex (M/F)                                                     | Female            | Female            | Male              | Female            | Female            | Male              | Male              | Male              |
| Donor BMI (kg/m <sup>2</sup> )                                      | 27.3              | 21.9              | 25.9              | 16.8              | 23.7              | 23.1              | 32.9              | 30.8              |
| Donor HbA <sub>1c</sub> or other measure of blood glucose control   | no data           | no data           | no data           | no data           | 6.2               | no data           | no data           | no data           |
| Origin/source of islets <sup>b</sup>                                | Alberta IsletCore | Alberta IsletCore | Alberta IsletCore | Alberta IsletCore | Alberta IsletCore | Alberta IsletCore | Alberta IsletCore | Alberta IsletCore |
| Islet isolation centre                                              | Alberta IsletCore | Alberta IsletCore | Alberta IsletCore | Alberta IsletCore | Alberta IsletCore | Alberta IsletCore | Alberta IsletCore | Alberta IsletCore |
| Donor history of diabetes? Please select yes/no from drop down list | NO                | NO                | NO                | NO                | NO                | NO                | NO                | NO                |

  

| Islet preparation                                                 | 9    | 10     | 11     | 12      | 13   | 14     | 15      | 16      |
|-------------------------------------------------------------------|------|--------|--------|---------|------|--------|---------|---------|
| <b>MANDATORY INFORMATION</b>                                      |      |        |        |         |      |        |         |         |
| Unique identifier                                                 | R039 | R040   | R041   | R042    | R044 | R045   | R047    | R049    |
| Donor age (years)                                                 | 46   | 50     | 30     | 44      | 38   | 27     | 56      | 79      |
| Donor sex (M/F)                                                   | Male | Female | Female | Male    | Male | Female | Female  | Male    |
| Donor BMI (kg/m <sup>2</sup> )                                    | 36.0 | 27.7   | 15.4   | 35.1    | 24.7 | 19.5   | 32.0    | 21.3    |
| Donor HbA <sub>1c</sub> or other measure of blood glucose control | 5.9  | 5.9    | 5.7    | no data | 5.9  | 5.2    | no data | no data |

|                                                                        |                   |                   |                   |                   |                   |                   |                   |                   |
|------------------------------------------------------------------------|-------------------|-------------------|-------------------|-------------------|-------------------|-------------------|-------------------|-------------------|
| Origin/source of islets <sup>b</sup>                                   | Alberta IsletCore | Alberta IsletCore | Alberta IsletCore | Alberta IsletCore | Alberta IsletCore | Alberta IsletCore | Alberta IsletCore | Alberta IsletCore |
| Islet isolation centre                                                 | Alberta IsletCore | Alberta IsletCore | Alberta IsletCore | Alberta IsletCore | Alberta IsletCore | Alberta IsletCore | Alberta IsletCore | Alberta IsletCore |
| Donor history of diabetes?<br>Please select yes/no from drop down list | NO                | NO                | NO                | NO                | NO                | NO                | NO                | NO                |

| Islet preparation                                                      | 17                | 18                | 19                | 20                | 21                | 22                | 23                | 24                |
|------------------------------------------------------------------------|-------------------|-------------------|-------------------|-------------------|-------------------|-------------------|-------------------|-------------------|
| <b>MANDATORY INFORMATION</b>                                           |                   |                   |                   |                   |                   |                   |                   |                   |
| Unique identifier                                                      | R050              | R051              | R052              | R055              | R056              | R058              | R060              | R061              |
| Donor age (years)                                                      | 72                | 73                | 48                | 67                | 33                | 79                | 54                | 63                |
| Donor sex (M/F)                                                        | Female            | Male              | Male              | Female            | Male              | Female            | Female            | Male              |
| Donor BMI (kg/m <sup>2</sup> )                                         | 40.4              | 23.7              | 29.1              | 25.7              | 28.7              | 23.8              | 21.1              | 37.6              |
| Donor HbA <sub>1c</sub> or other measure of blood glucose control      | 5.8               | 5.7               | no data           | 6                 | 4.8               | 5.8               | 5.8               | 5.7               |
| Origin/source of islets <sup>b</sup>                                   | Alberta IsletCore | Alberta IsletCore | Alberta IsletCore | Alberta IsletCore | Alberta IsletCore | Alberta IsletCore | Alberta IsletCore | Alberta IsletCore |
| Islet isolation centre                                                 | Alberta IsletCore | Alberta IsletCore | Alberta IsletCore | Alberta IsletCore | Alberta IsletCore | Alberta IsletCore | Alberta IsletCore | Alberta IsletCore |
| Donor history of diabetes?<br>Please select yes/no from drop down list | NO                | NO                | NO                | NO                | NO                | NO                | NO                | NO                |

| Islet preparation            | 25   | 26   | 27   | 28   | 29   | 30   | 31   | 32   |
|------------------------------|------|------|------|------|------|------|------|------|
| <b>MANDATORY INFORMATION</b> |      |      |      |      |      |      |      |      |
| Unique identifier            | R065 | R066 | R067 | R072 | R073 | R074 | R075 | R076 |



|                                                                        |    |    |    |    |    |    |    |    |
|------------------------------------------------------------------------|----|----|----|----|----|----|----|----|
| Donor history of diabetes?<br>Please select yes/no from drop down list | NO | NO | NO | NO | NO | NO | NO | NO |
|------------------------------------------------------------------------|----|----|----|----|----|----|----|----|

| Islet preparation                                                      | 41                | 42                | 43                | 44                | 45                | 46                | 47                | 48                |
|------------------------------------------------------------------------|-------------------|-------------------|-------------------|-------------------|-------------------|-------------------|-------------------|-------------------|
| <b>MANDATORY INFORMATION</b>                                           |                   |                   |                   |                   |                   |                   |                   |                   |
| Unique identifier                                                      | R091              | R092              | R094              | R096              | R098              | R099              | R100              | R101              |
| Donor age (years)                                                      | 65                | 77                | 46                | 53                | 62                | 34                | 80                | 59                |
| Donor sex (M/F)                                                        | Female            | Male              | Female            | Female            | Female            | Female            | Male              | Female            |
| Donor BMI (kg/m <sup>2</sup> )                                         | 25.5              | 20.7              | 28.1              | 18.8              | 21.1              | 39.0              | 19.7              | 25.9              |
| Donor HbA <sub>1c</sub> or other measure of blood glucose control      | 5.6               | 5.7               | 5.8               | 5                 | 6.3               | 5.5               | 5.2               | 5.5               |
| Origin/source of islets <sup>b</sup>                                   | Alberta IsletCore | Alberta IsletCore | Alberta IsletCore | Alberta IsletCore | Alberta IsletCore | Alberta IsletCore | Alberta IsletCore | Alberta IsletCore |
| Islet isolation centre                                                 | Alberta IsletCore | Alberta IsletCore | Alberta IsletCore | Alberta IsletCore | Alberta IsletCore | Alberta IsletCore | Alberta IsletCore | Alberta IsletCore |
| Donor history of diabetes?<br>Please select yes/no from drop down list | NO                | NO                | NO                | NO                | NO                | NO                | NO                | NO                |

| Islet preparation              | 49   | 50   | 51     | 52   | 53     | 54     | 55     | 56   |
|--------------------------------|------|------|--------|------|--------|--------|--------|------|
| <b>MANDATORY INFORMATION</b>   |      |      |        |      |        |        |        |      |
| Unique identifier              | R102 | R104 | R105   | R106 | R108   | R109   | R112   | R113 |
| Donor age (years)              | 54   | 42   | 59     | 52   | 59     | 60     | 54     | 62   |
| Donor sex (M/F)                | Male | Male | Female | Male | Female | Female | Female | Male |
| Donor BMI (kg/m <sup>2</sup> ) | 41.4 | 27.1 | 35.1   | 19.9 | 24.8   | 25.0   | 32.9   | 30.5 |











|                                                                        |                   |                   |                   |                   |                   |                   |                   |                   |
|------------------------------------------------------------------------|-------------------|-------------------|-------------------|-------------------|-------------------|-------------------|-------------------|-------------------|
| Islet isolation centre                                                 | Alberta IsletCore | Alberta IsletCore | Alberta IsletCore | Alberta IsletCore | Alberta IsletCore | Alberta IsletCore | Alberta IsletCore | Alberta IsletCore |
| Donor history of diabetes?<br>Please select yes/no from drop down list | NO                | NO                | NO                | NO                | NO                | NO                | NO                | NO                |

| Islet preparation                                                      | 105               | 106               | 107               | 108               | 109               | 110               | 111               | 112               |
|------------------------------------------------------------------------|-------------------|-------------------|-------------------|-------------------|-------------------|-------------------|-------------------|-------------------|
| <b>MANDATORY INFORMATION</b>                                           |                   |                   |                   |                   |                   |                   |                   |                   |
| Unique identifier                                                      | R194              | R200              | R202              | R203              | R204              | R205              | R207              | R208              |
| Donor age (years)                                                      | 54                | 65                | 68                | 50                | 62                | 53                | 50                | 27                |
| Donor sex (M/F)                                                        | Male              | Male              | Female            | Male              | Male              | Male              | Female            | Male              |
| Donor BMI (kg/m <sup>2</sup> )                                         | 32.3              | 27.1              | 25.2              | 44.4              | 23.8              | 29.6              | 22.2              | 29.0              |
| Donor HbA <sub>1c</sub> or other measure of blood glucose control      | 5.7               | 5.1               | 5.7               | 5.7               | 5.6               | 5.9               | no data           | 5.5               |
| Origin/source of islets <sup>b</sup>                                   | Alberta IsletCore | Alberta IsletCore | Alberta IsletCore | Alberta IsletCore | Alberta IsletCore | Alberta IsletCore | Alberta IsletCore | Alberta IsletCore |
| Islet isolation centre                                                 | Alberta IsletCore | Alberta IsletCore | Alberta IsletCore | Alberta IsletCore | Alberta IsletCore | Alberta IsletCore | Alberta IsletCore | Alberta IsletCore |
| Donor history of diabetes?<br>Please select yes/no from drop down list | NO                | NO                | NO                | NO                | NO                | NO                | NO                | NO                |

| Islet preparation            | 113  | 114  | 115  | 116    | 117    | 118  | 119  | 120  |
|------------------------------|------|------|------|--------|--------|------|------|------|
| <b>MANDATORY INFORMATION</b> |      |      |      |        |        |      |      |      |
| Unique identifier            | R210 | R215 | R216 | R217   | R218   | R219 | R221 | R223 |
| Donor age (years)            | 46   | 51   | 38   | 71     | 73     | 53   | 44   | 54   |
| Donor sex (M/F)              | Male | Male | Male | Female | Female | Male | Male | Male |



|                |  |  |  |  |  |  |  |  |
|----------------|--|--|--|--|--|--|--|--|
| drop down list |  |  |  |  |  |  |  |  |
|----------------|--|--|--|--|--|--|--|--|

| <b>Islet preparation</b>                                            | <b>129</b>        | <b>130</b>        | <b>131</b>        | <b>132</b>        | <b>133</b>        | <b>134</b>        | <b>135</b>        | <b>136</b>        |
|---------------------------------------------------------------------|-------------------|-------------------|-------------------|-------------------|-------------------|-------------------|-------------------|-------------------|
| <b>MANDATORY INFORMATION</b>                                        |                   |                   |                   |                   |                   |                   |                   |                   |
| Unique identifier                                                   | R235              | R237              | R238              | R243              | R245              | R246              | R247              | R248              |
| Donor age (years)                                                   | 53                | 61                | 52                | 39                | 63                | 65                | 72                | 29                |
| Donor sex (M/F)                                                     | Female            | Male              | Male              | Male              | Male              | Female            | Male              | Male              |
| Donor BMI (kg/m <sup>2</sup> )                                      | 24.5              | 19.7              | 26.1              | 27.1              | 22.3              | 39.2              | 23.9              | 23.7              |
| Donor HbA <sub>1c</sub> or other measure of blood glucose control   | 5.7               | 5.9               | 5.7               | 5.8               | 5.6               | 5.8               | no data           | 6.1               |
| Origin/source of islets <sup>b</sup>                                | Alberta IsletCore | Alberta IsletCore | Alberta IsletCore | Alberta IsletCore | Alberta IsletCore | Alberta IsletCore | Alberta IsletCore | Alberta IsletCore |
| Islet isolation centre                                              | Alberta IsletCore | Alberta IsletCore | Alberta IsletCore | Alberta IsletCore | Alberta IsletCore | Alberta IsletCore | Alberta IsletCore | Alberta IsletCore |
| Donor history of diabetes? Please select yes/no from drop down list | NO                | NO                | NO                | NO                | NO                | NO                | NO                | NO                |

| <b>Islet preparation</b>       | <b>137</b> | <b>138</b> | <b>139</b> | <b>140</b> | <b>141</b> | <b>142</b> | <b>143</b> | <b>144</b> |
|--------------------------------|------------|------------|------------|------------|------------|------------|------------|------------|
| <b>MANDATORY INFORMATION</b>   |            |            |            |            |            |            |            |            |
| Unique identifier              | R249       | R250       | R253       | R254       | R256       | R266       | R267       | R269       |
| Donor age (years)              | 62         | 58         | 57         | 62         | 23         | 74         | 67         | 14         |
| Donor sex (M/F)                | Female     | Male       | Male       | Male       | Male       | Female     | Female     | Male       |
| Donor BMI (kg/m <sup>2</sup> ) | 22.2       | 33.0       | 25.6       | 20.2       | 32.5       | 29.2       | 23.7       | 21.5       |





|                                                                        |                   |                   |                   |                   |                   |                   |                   |                   |
|------------------------------------------------------------------------|-------------------|-------------------|-------------------|-------------------|-------------------|-------------------|-------------------|-------------------|
| Islet isolation centre                                                 | Alberta IsletCore | Alberta IsletCore | Alberta IsletCore | Alberta IsletCore | Alberta IsletCore | Alberta IsletCore | Alberta IsletCore | Alberta IsletCore |
| Donor history of diabetes?<br>Please select yes/no from drop down list | NO                | NO                | NO                | NO                | NO                | NO                | NO                | NO                |

| Islet preparation                                                      | 169               | 170               | 171               | 172               | 173               | 174               | 175               | 176               |
|------------------------------------------------------------------------|-------------------|-------------------|-------------------|-------------------|-------------------|-------------------|-------------------|-------------------|
| <b>MANDATORY INFORMATION</b>                                           |                   |                   |                   |                   |                   |                   |                   |                   |
| Unique identifier                                                      | R303              | R304              | R305              | R306              | R308              | R309              | R310              | R313              |
| Donor age (years)                                                      | 56                | 46                | 60                | 22                | 20                | 47                | 25                | 41                |
| Donor sex (M/F)                                                        | Female            | Male              | Male              | Female            | Male              | Female            | Male              | Male              |
| Donor BMI (kg/m <sup>2</sup> )                                         | 24.1              | 21.5              | 21                | 21.1              | 19.8              | 27.4              | 26.4              | 29                |
| Donor HbA <sub>1c</sub> or other measure of blood glucose control      | no data           | no data           | 5.6               | 5.3               | 5.5               | 5.5               | 5.4               | 5.5               |
| Origin/source of islets <sup>b</sup>                                   | Alberta IsletCore | Alberta IsletCore | Alberta IsletCore | Alberta IsletCore | Alberta IsletCore | Alberta IsletCore | Alberta IsletCore | Alberta IsletCore |
| Islet isolation centre                                                 | Alberta IsletCore | Alberta IsletCore | Alberta IsletCore | Alberta IsletCore | Alberta IsletCore | Alberta IsletCore | Alberta IsletCore | Alberta IsletCore |
| Donor history of diabetes?<br>Please select yes/no from drop down list | NO                | NO                | NO                | NO                | NO                | NO                | NO                | NO                |

| Islet preparation            | 177    | 178  | 179  | 180  | 181  | 182  | 183    | 184    |
|------------------------------|--------|------|------|------|------|------|--------|--------|
| <b>MANDATORY INFORMATION</b> |        |      |      |      |      |      |        |        |
| Unique identifier            | R314   | R316 | R317 | R318 | R319 | R320 | R321   | R322   |
| Donor age (years)            | 31     | 52   | 54   | 54   | 68   | 58   | 25     | 44     |
| Donor sex (M/F)              | Female | Male | Male | Male | Male | Male | Female | Female |





|                |  |  |  |  |  |  |  |  |
|----------------|--|--|--|--|--|--|--|--|
| drop down list |  |  |  |  |  |  |  |  |
|----------------|--|--|--|--|--|--|--|--|

| <b>Islet preparation</b>                                               | <b>193</b>        | <b>194</b>        | <b>195</b>        | <b>196</b>        | <b>197</b>        | <b>198</b>        | <b>199</b>        | <b>200</b>        |
|------------------------------------------------------------------------|-------------------|-------------------|-------------------|-------------------|-------------------|-------------------|-------------------|-------------------|
| <b>MANDATORY INFORMATION</b>                                           |                   |                   |                   |                   |                   |                   |                   |                   |
| Unique identifier                                                      | R333              | R334              | R335              | R338              | R340              | R341              | R342              | R343              |
| Donor age (years)                                                      | 23                | 50                | 25                | 30                | 36                | 42                | 35                | 53                |
| Donor sex (M/F)                                                        | Male              | Female            | Male              | Male              | Male              | Male              | Male              | Female            |
| Donor BMI (kg/m <sup>2</sup> )                                         | 24                | 31.2              | 24.6              | 25.5              | 23.3              | 30                | 25.1              | 32.8              |
| Donor HbA <sub>1c</sub> or other measure of blood glucose control      | 5                 | 5.8               | 4.9               | 5.3               | 5.3               | no data           | 5.5               | 5.7               |
| Origin/source of islets <sup>b</sup>                                   | Alberta IsletCore | Alberta IsletCore | Alberta IsletCore | Alberta IsletCore | Alberta IsletCore | Alberta IsletCore | Alberta IsletCore | Alberta IsletCore |
| Islet isolation centre                                                 | Alberta IsletCore | Alberta IsletCore | Alberta IsletCore | Alberta IsletCore | Alberta IsletCore | Alberta IsletCore | Alberta IsletCore | Alberta IsletCore |
| Donor history of diabetes?<br>Please select yes/no from drop down list | NO                | NO                | NO                | NO                | NO                | NO                | NO                | NO                |

| <b>Islet preparation</b>       | <b>201</b> | <b>202</b> | <b>203</b> | <b>204</b> | <b>205</b> | <b>206</b> | <b>207</b> | <b>208</b> |
|--------------------------------|------------|------------|------------|------------|------------|------------|------------|------------|
| <b>MANDATORY INFORMATION</b>   |            |            |            |            |            |            |            |            |
| Unique identifier              | R344       | R346       | R348       | R350       | R351       | R352       | R353       | R354       |
| Donor age (years)              | 59         | 27         | 43         | 38         | 51         | 64         | 69         | 75         |
| Donor sex (M/F)                | Male       | Male       | Female     | Female     | Male       | Female     | Male       | Male       |
| Donor BMI (kg/m <sup>2</sup> ) | 27.8       | 24.6       | 16.4       | 21.7       | 21.4       | 20.4       | 22.7       | 30.2       |





|                                                                     |                   |                   |                   |                   |                   |                   |                   |                   |
|---------------------------------------------------------------------|-------------------|-------------------|-------------------|-------------------|-------------------|-------------------|-------------------|-------------------|
| Islet isolation centre                                              | Alberta IsletCore | Alberta IsletCore | Alberta IsletCore | Alberta IsletCore | Alberta IsletCore | Alberta IsletCore | Alberta IsletCore | Alberta IsletCore |
| Donor history of diabetes? Please select yes/no from drop down list | NO                | NO                | NO                | NO                | NO                | NO                | NO                | NO                |

| Islet preparation                                                   | 233               | 234               | 235               | 236               | 237               | 238               | 239               |
|---------------------------------------------------------------------|-------------------|-------------------|-------------------|-------------------|-------------------|-------------------|-------------------|
| <b>MANDATORY INFORMATION</b>                                        |                   |                   |                   |                   |                   |                   |                   |
| Unique identifier                                                   | R387              | R388              | R389              | R390              | R391              | R392              | R394              |
| Donor age (years)                                                   | 53                | 45                | 65                | 3                 | 67                | 8                 | 2                 |
| Donor sex (M/F)                                                     | Female            | Male              | Female            | Male              | Male              | Female            | Female            |
| Donor BMI (kg/m <sup>2</sup> )                                      | 31                | 33.8              | 24.4              | 19.8              | 24.5              | 15.9              | 18.9              |
| Donor HbA <sub>1c</sub> or other measure of blood glucose control   | 5.6               | 5.3               | 5.5               | 3.1               | 4.9               | 4.8               | 5.1               |
| Origin/source of islets <sup>b</sup>                                | Alberta IsletCore | Alberta IsletCore | Alberta IsletCore | Alberta IsletCore | Alberta IsletCore | Alberta IsletCore | Alberta IsletCore |
| Islet isolation centre                                              | Alberta IsletCore | Alberta IsletCore | Alberta IsletCore | Alberta IsletCore | Alberta IsletCore | Alberta IsletCore | Alberta IsletCore |
| Donor history of diabetes? Please select yes/no from drop down list | NO                | NO                | NO                | NO                | NO                | NO                | NO                |

## References

[1] R Core Team (2022) R: A Language and Environment for Statistical Computing. Available from <https://www.R-project.org>
